# Supplementary material for: Clustering-triggered emission of poly(vinyl) alcohol
Source: Royal Society of Chemistry journal article supplement (doi:10.1039/d1py01033f), 2021-01-01
Supplement: d1py01033f1.pdf [file d1py01033f1.pdf]

## Supporting Information

### Clustering-triggered Emission of Poly(vinyl) Alcohol

Jingfei Wang<sup>a</sup>, Lifeng Xu<sup>a</sup>, Shuangling Zhong<sup>b</sup>, Gangying Feng<sup>a</sup>, Yongyan Yang<sup>a</sup>, Qingye

Meng<sup>a</sup>, Yan Gao<sup>a,c,d</sup>, Xuejun Cui<sup>a,d</sup> \*

<sup>a</sup> College of Chemistry, Jilin University, Changchun, 130012, P.R. China

<sup>b</sup> College of Resources and Environment, Jilin Agricultural University, Changchun 130118,  
P.R. China

<sup>c</sup> State Key Laboratory of Supramolecular Structure and Materials, College of Chemistry, Jilin  
University, Changchun, 130012, P.R. China

<sup>d</sup> Weihai Institute for Bionics-Jilin University, Weihai, 264400, P.R. China

\* Corresponding Author Email: cui\_xj@jlu.edu.cn

#### Table of Contents

|                                                                                                  |     |
|--------------------------------------------------------------------------------------------------|-----|
| General Experimental Details                                                                     | 2   |
| Fluorescence data of PVA <sub>0588LV</sub>                                                       | S1  |
| Fluorescence data of PVA <sub>1788</sub>                                                         | S2  |
| Fluorescence data of PVA <sub>1788LV</sub>                                                       | S3  |
| Fluorescence data of PVA <sub>1799</sub>                                                         | S4  |
| PL spectra of PVA solutions under different $\lambda_{ex}$                                       | S5  |
| PL spectrum of DMSO and PVA <sub>105</sub> in DMSO/water mixtures under different $\lambda_{ex}$ | S6  |
| PL spectrum of pure solvent under different $\lambda_{ex}$                                       | S7  |
| The temperature dependence of PVA <sub>105</sub> 's PL spectra                                   | S8  |
| DLS results of PVA in different viscosity                                                        | S9  |
| PL spectra of PVA films                                                                          | S10 |
| Photos of PVA powders and films                                                                  | S11 |
| Supplementary data of PVA <sub>105</sub> and PVA <sub>224</sub>                                  | S12 |
| Breaking strength of different PVA films                                                         | S13 |
| FT-IR spectra of different PVA                                                                   | S14 |
| <sup>1</sup> H NMR Spectrum of PVA in D <sub>2</sub> O at 400 MHz                                | S15 |
| PL spectra of PVA <sub>105</sub> aqueous solutions added with different metal ions               | S16 |

## Experiment Section

### Materials.

PVA was purchased from Macklin, (Shanghai, China). Tetrahydrofuran (THF) was obtained from Sinopharm Chemical Reagent Co., Ltd. (Shanghai, China). DMSO, Acetic acid were obtained from Sinopharm Chemical Reagent Co., Ltd. (Shanghai, China).  $\text{Al}(\text{NO}_3)_3$ ,  $\text{NaNO}_3$ ,  $\text{Cr}(\text{NO}_3)_3$ ,  $\text{CuNO}_3$ ,  $\text{Mg}(\text{NO}_3)_2$ ,  $\text{KNO}_3$ ,  $\text{Ca}(\text{NO}_3)_2$ ,  $\text{Co}(\text{NO}_3)_2$ ,  $\text{CsNO}_3$ ,  $\text{K}_2\text{Cr}_2\text{O}_7$  were all obtained from Sinopharm Chemical Reagent Co., Ltd. (Shanghai, China). The water used in all experiments was distilled water.

### Characterizations.

Fluorescence spectra, fluorescent lifetime, quantum yields of the solutions and solids were all recorded on Steady-state Transient Fluorescence Spectrometer using an FLS920 fluorescence spectrophotometer (Edinburgh Instrument Ltd., Livingston, UK). The average particle size and size distribution of the gelatin were characterized on a Brookhaven Zeta Plus potential analyzer (Brookhaven Instruments Corporation, USA) at 25 °C.

PVA solutions were put into PP matrix and dried in vacuum drying oven in 50 °C one day to produced PVA films. The films were cut into 1.5 cm\*1.5 cm squares. The strength of films were tested in CMT-005L Electronic Universal Testing Machine (Liangong Testing Technology Co.Ltd, Jinan). The test spacing is 60 mm, tensile speed is 100 mm/min.

### Purification and Preparation of PVA

The distilled water was heated to 70°C in water bath magnetic stirrer for 20 minutes, then PVA powder was put into hot water in the stirring process and heated to 90°C. The solution

was stirred for 2 hours to produce PVA aqueous solutions. Then THF (water/THF, 1/10, v/v) is added as a non-solvent to precipitate PVA. The precipitate was collected after centrifuging. After centrifuging, the collected powder was dried in a freeze dryer for 24 hours, and then refrigerated for later use. Next, preparing PVA solutions of different concentrations to measure fluorescence property.

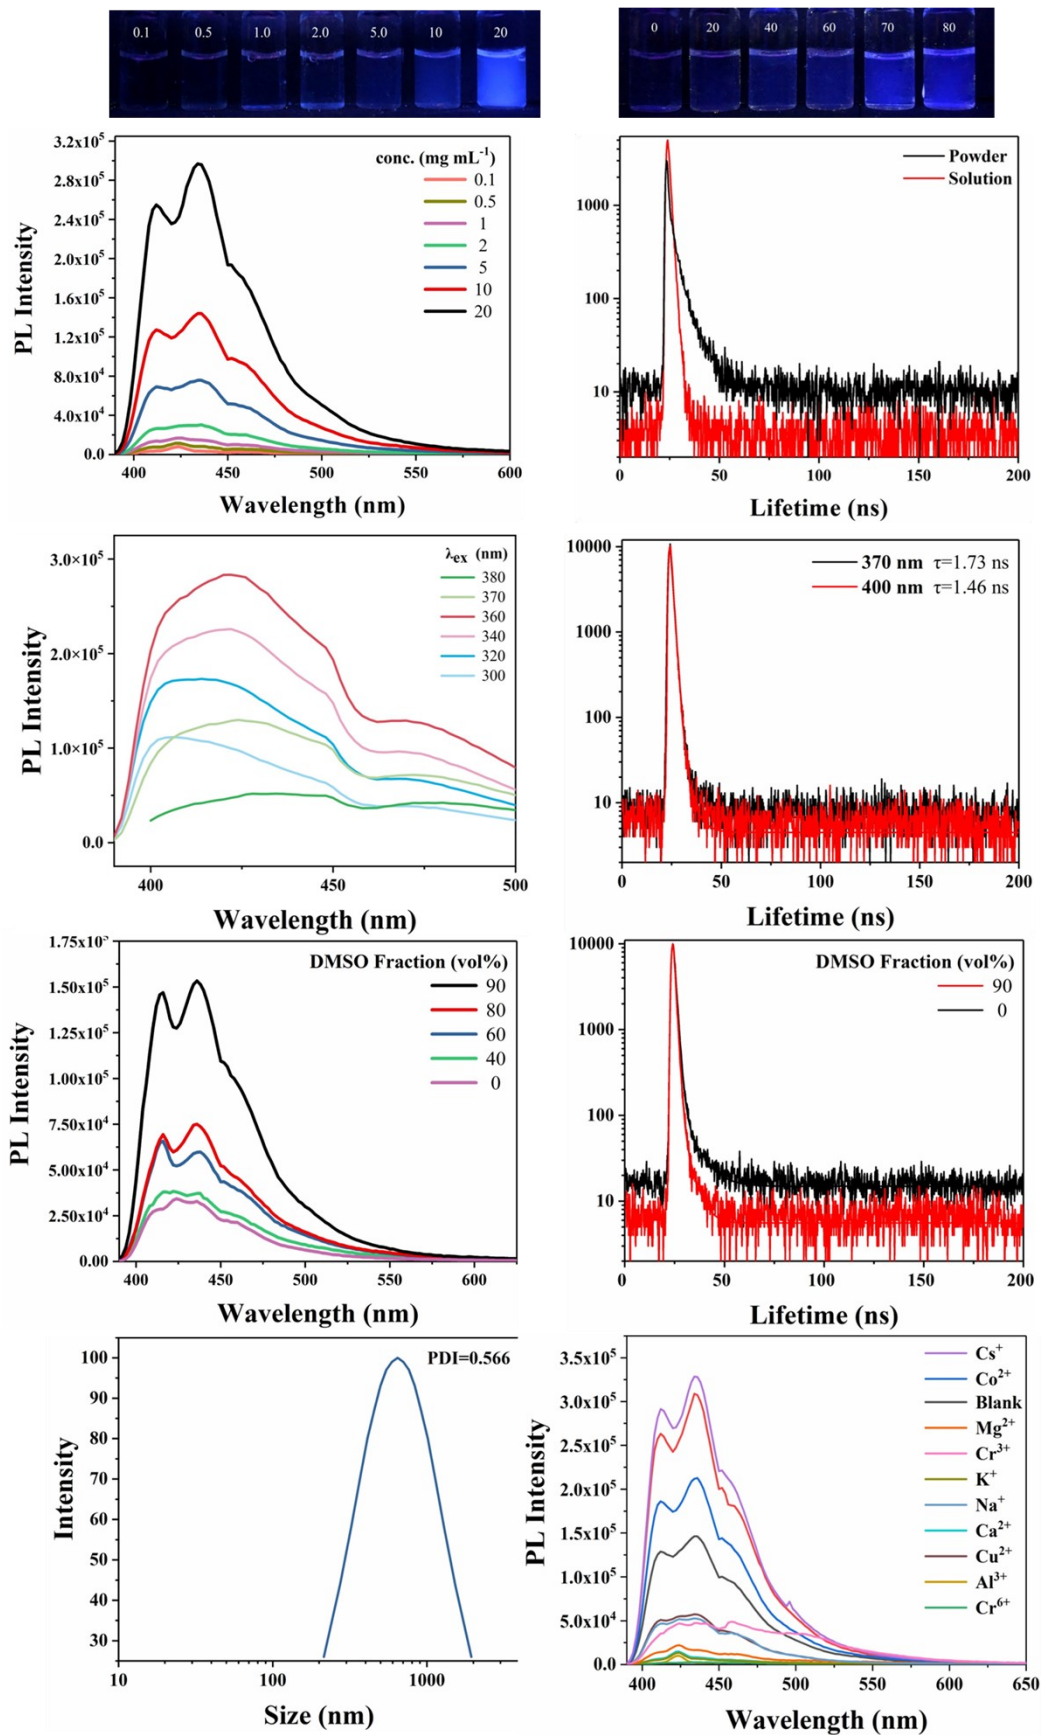

## Results and Discussion

**Figure S1.** PVA<sub>0588LV</sub> A) solution with different concentration and B) water/DMSO mixtures with different DMSO fraction photos taken under 365 nm UV light. C) PL spectra of PVA<sub>0588LV</sub> solutions in different concentration.  $\lambda_{\text{ex}}=370$  nm. D) Fluorescence lifetime of PVA<sub>0588LV</sub> powders and solution. E) PL spectra of PVA<sub>0588LV</sub> solution with different  $\lambda_{\text{ex}}$ . F) Fluorescence lifetime of 20 mg mL<sup>-1</sup> PVA<sub>0588LV</sub> solutions monitored at 370 nm and 400 nm. G) PL spectra of PVA<sub>0588LV</sub> water/DMSO mixtures. H) Fluorescence lifetime of PVA<sub>0588LV</sub> water/DMSO mixtures. I) DLS result of PVA<sub>0588LV</sub> in mixtures (10/90) of water and DMSO. J) PL spectra of PVA<sub>0588LV</sub> aqueous solutions (10 mg mL<sup>-1</sup>) added with different metal ions of same concentration (1 mg mL<sup>-1</sup>).

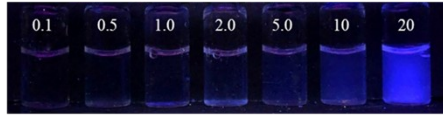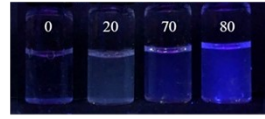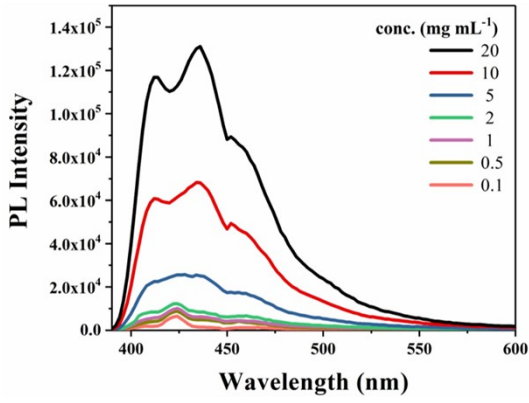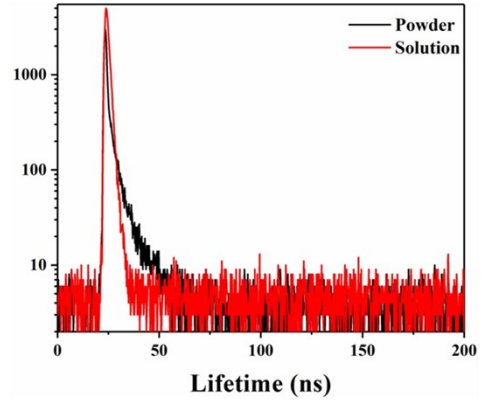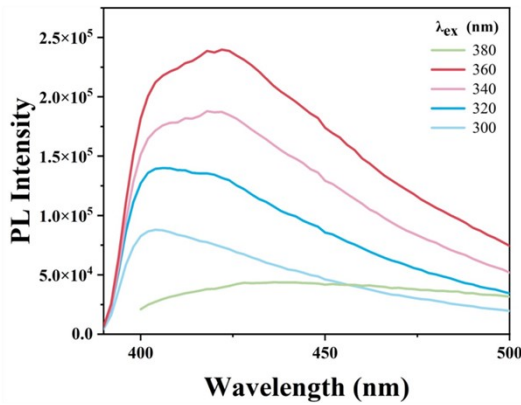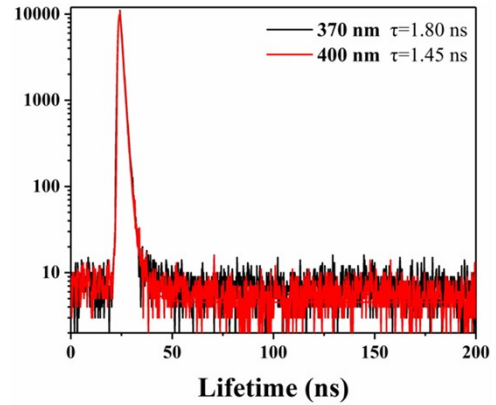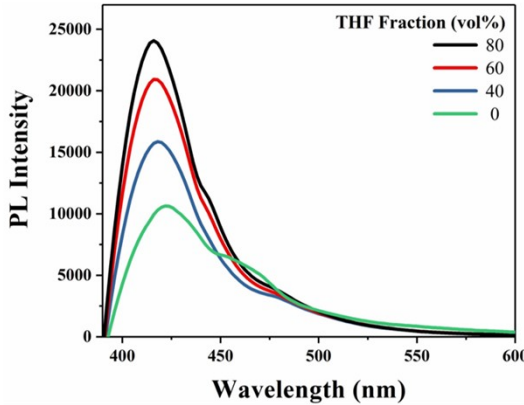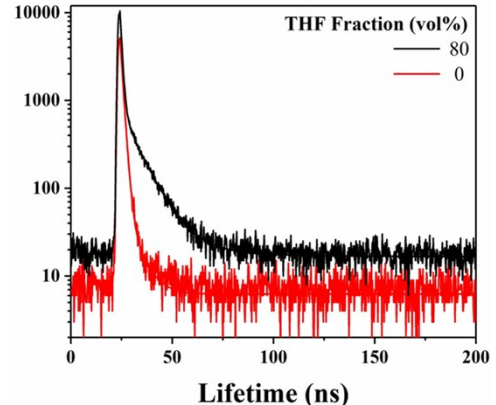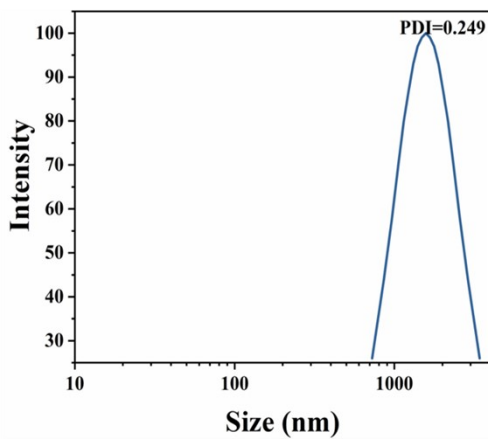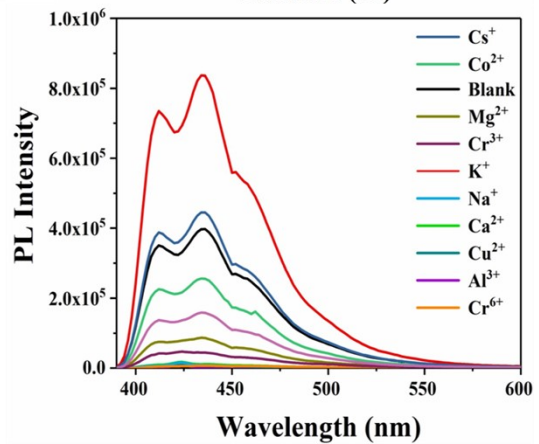

**Figure S2.** PVA<sub>1788</sub> A) solution with different concentration and B) water/THF mixtures with different THF fraction photos taken under 365 nm UV light. C) PL spectra of PVA<sub>1788</sub> solutions in different concentration.  $\lambda_{\text{ex}}=370$  nm. D) Fluorescence lifetime of PVA<sub>1788</sub> powders and solution. E) PL spectra of PVA<sub>1788</sub> solution with different  $\lambda_{\text{ex}}$ . F) Fluorescence lifetime of 20 mg mL<sup>-1</sup> PVA<sub>1788</sub> solutions monitored at 370 nm and 400 nm. G) PL spectra of PVA<sub>1788</sub> water/THF mixtures. H) Fluorescence lifetime of PVA<sub>1788</sub> water/THF mixtures. I) DLS result of PVA<sub>1788</sub> in mixtures (20/80) of water and THF. J) PL spectra of PVA<sub>1788</sub> aqueous solutions (10 mg mL<sup>-1</sup>) added with different metal ions of same concentration (1 mg mL<sup>-1</sup>).

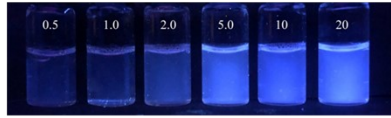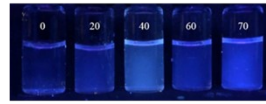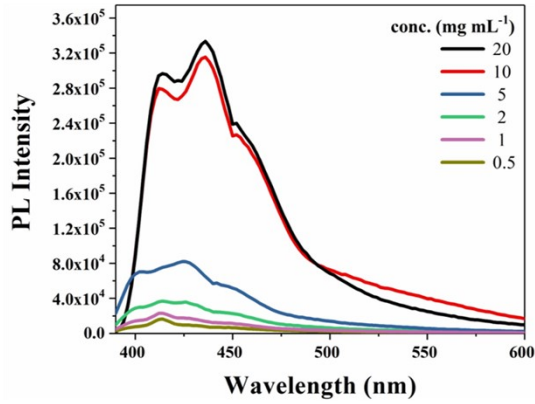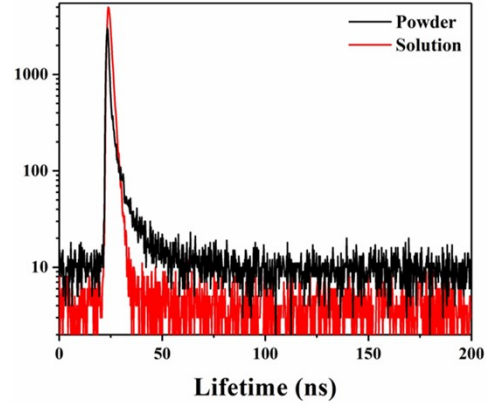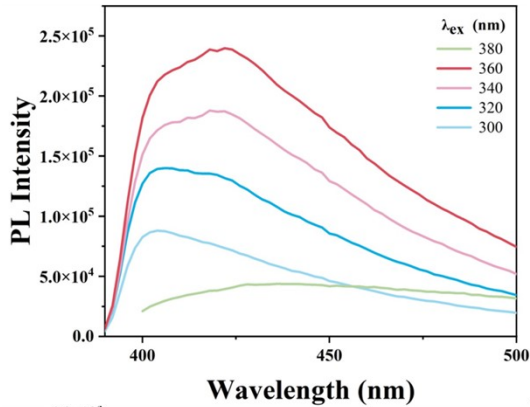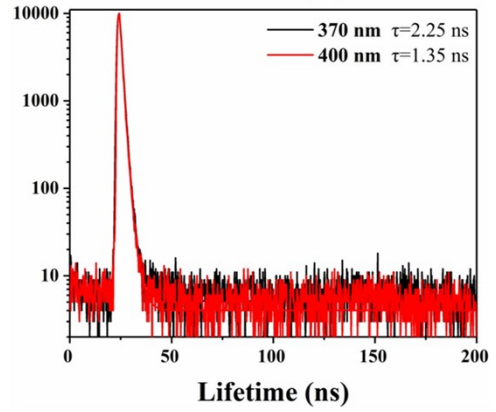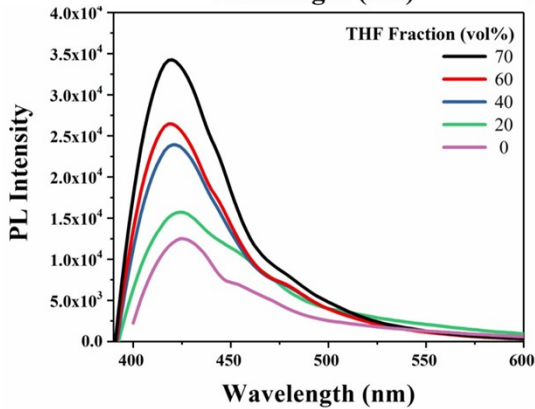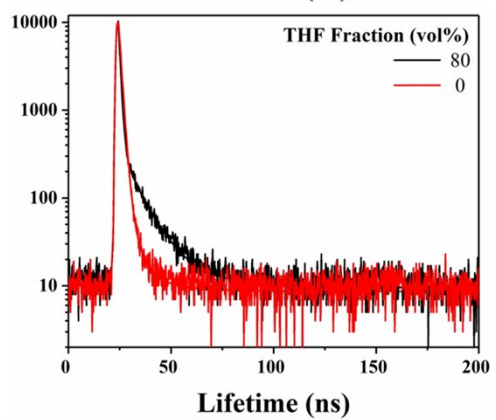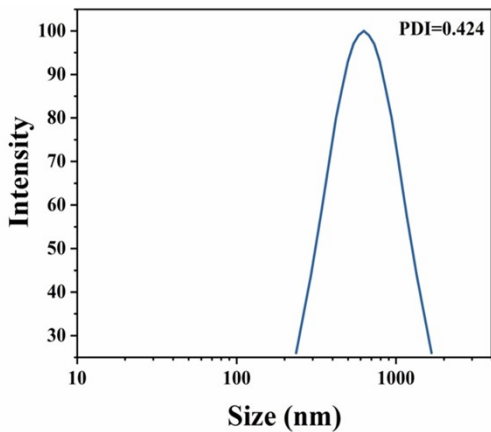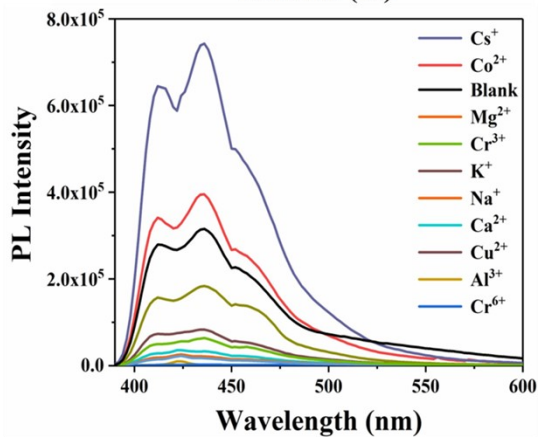



**Figure S3.** PVA<sub>1788LV</sub> A) solution with different concentration and B) water/THF mixtures with different THF fraction photos taken under 365 nm UV light. C) PL spectra of PVA<sub>1788</sub> solutions in different concentration.  $\lambda_{\text{ex}}=370$  nm. D) Fluorescence lifetime of PVA<sub>1788LV</sub> powders and solution. E) PL spectra of PVA<sub>1788</sub> low-viscosity solution with different  $\lambda_{\text{ex}}$ . F) Fluorescence lifetime of 20 mg mL<sup>-1</sup> PVA<sub>1788LV</sub> solutions monitored at 370 nm and 400 nm. G) PL spectra of PVA<sub>1788LV</sub> water/THF mixtures. H) Fluorescence lifetime of PVA<sub>1788LV</sub> water/THF mixtures. I) DLS result of PVA<sub>1788LV</sub> in mixtures (20/80) of water and THF. J) PL spectra of PVA<sub>1788LV</sub> aqueous solutions (10 mg mL<sup>-1</sup>) added with different metal ions of same concentration (1 mg mL<sup>-1</sup>).

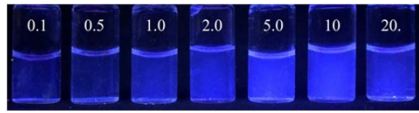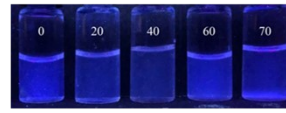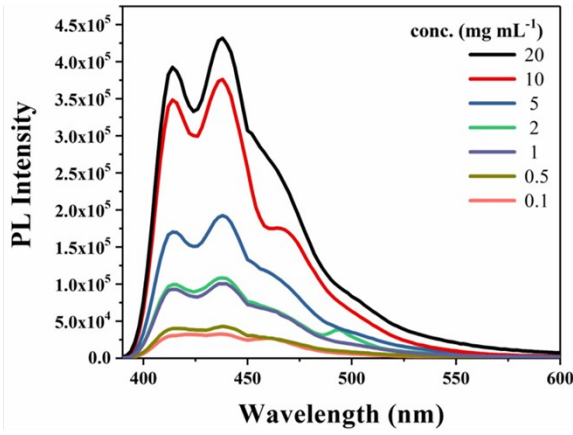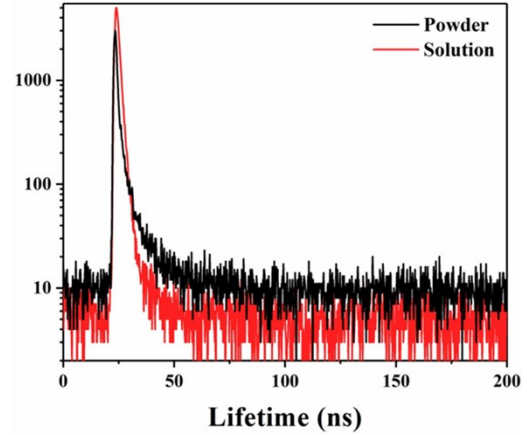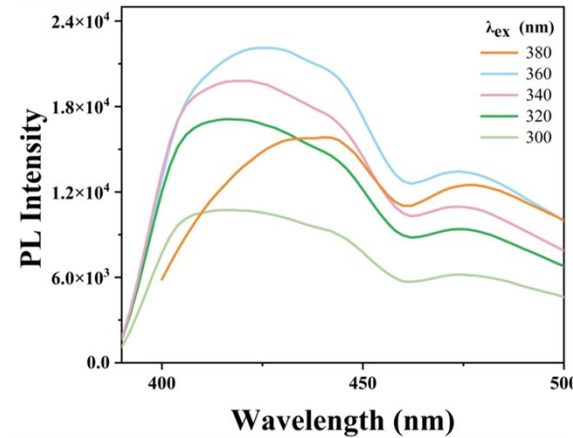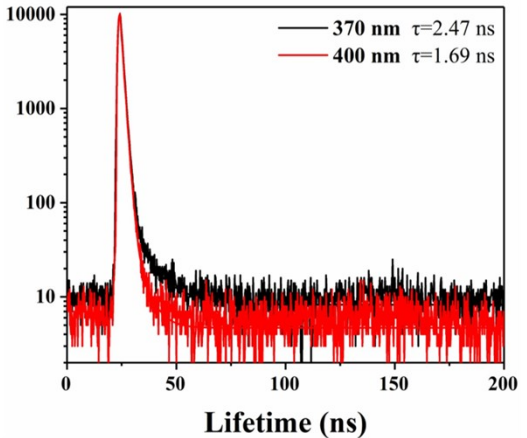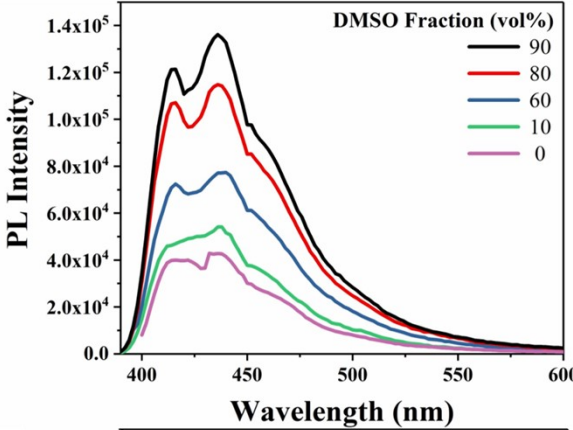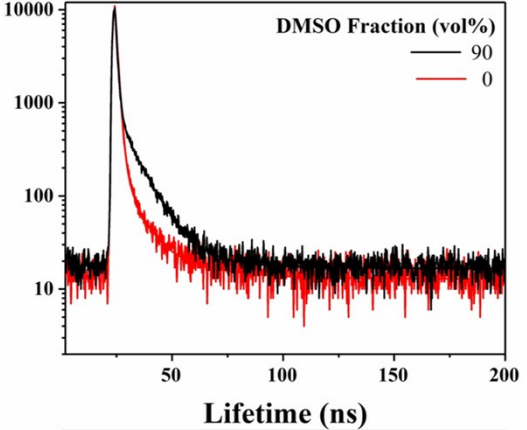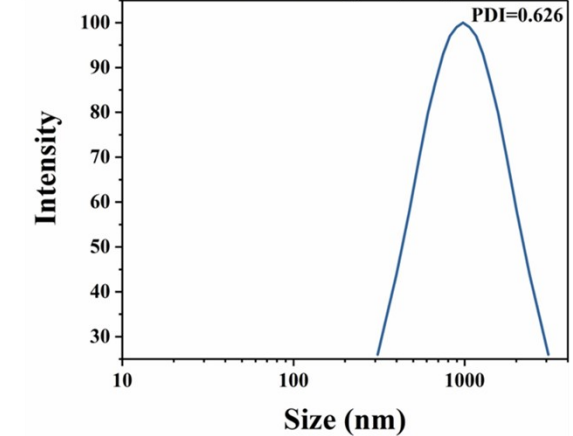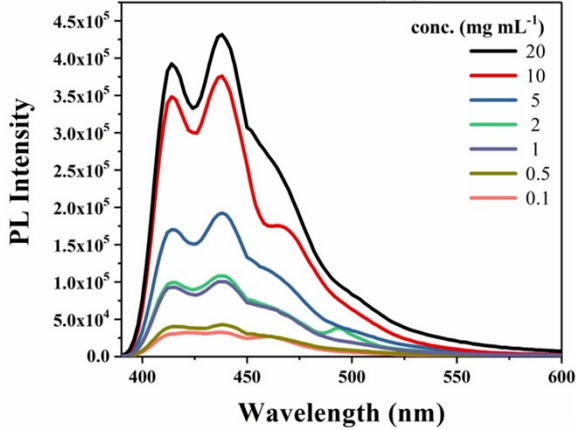

**Figure S4.** PVA<sub>1799</sub> A) solution with different concentration and B) water/DMSO mixtures with different DMSO fraction photos taken under 365 nm UV light. C) PL spectra of PVA<sub>1799</sub> solutions in different concentration.  $\lambda_{\text{ex}}=370$  nm. D) Fluorescence lifetime of PVA<sub>1799</sub> powders and solution. E) PL spectra of PVA<sub>1799</sub> solution with different  $\lambda_{\text{ex}}$ . F) Fluorescence lifetime of 20 mg mL<sup>-1</sup> PVA<sub>1799</sub> solutions monitored at 370 nm and 400 nm. G) PL spectra of PVA<sub>1799</sub> water/DMSO mixtures. H) Fluorescence lifetime of PVA<sub>1799</sub> water/DMSO mixtures. I) DLS result of PVA<sub>1799</sub> in mixtures (10/90) of water and DMSO. J) PL spectra of PVA<sub>1799</sub> aqueous solutions (10 mg mL<sup>-1</sup>) added with different metal ions of same concentration (1 mg mL<sup>-1</sup>).

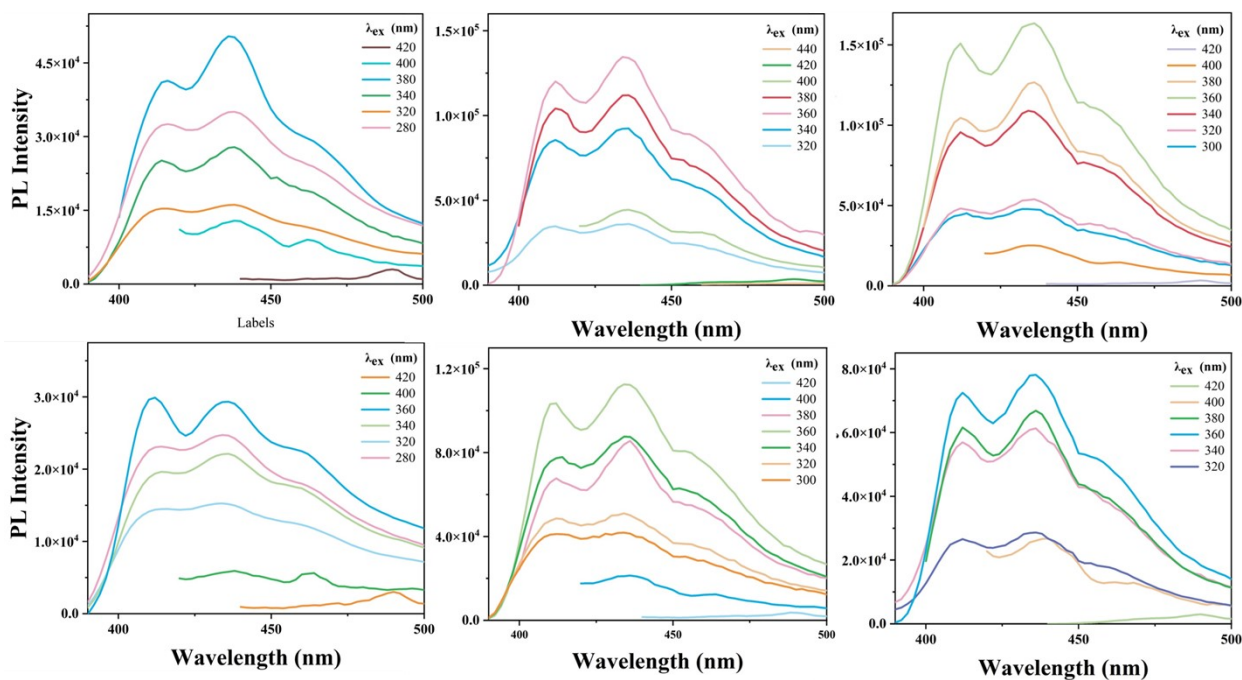

**Figure S5.** PL spectrum of PVA solutions ( $20 \text{ mg mL}^{-1}$ ) under different  $\lambda_{\text{ex}}$ .

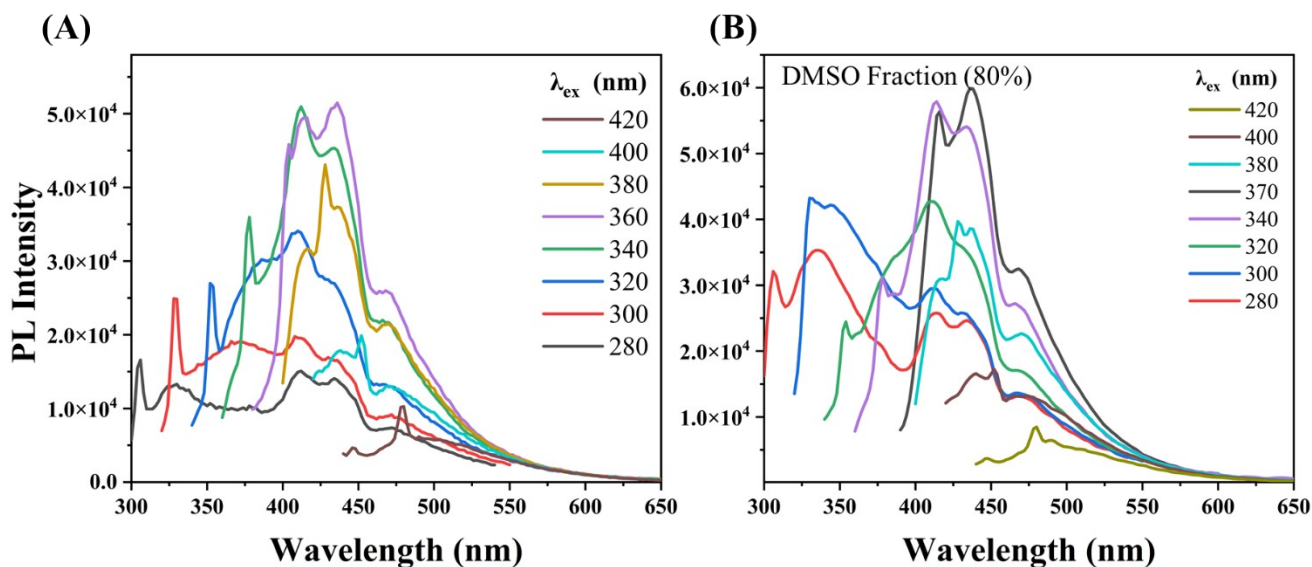

**Figure S6.** (A) PL spectrum of DMSO under different  $\lambda_{\text{ex}}$ . (B) PL spectra of PVA<sub>105</sub> in mixtures (20/80) of water and DMSO solution with different  $\lambda_{\text{ex}}$ .

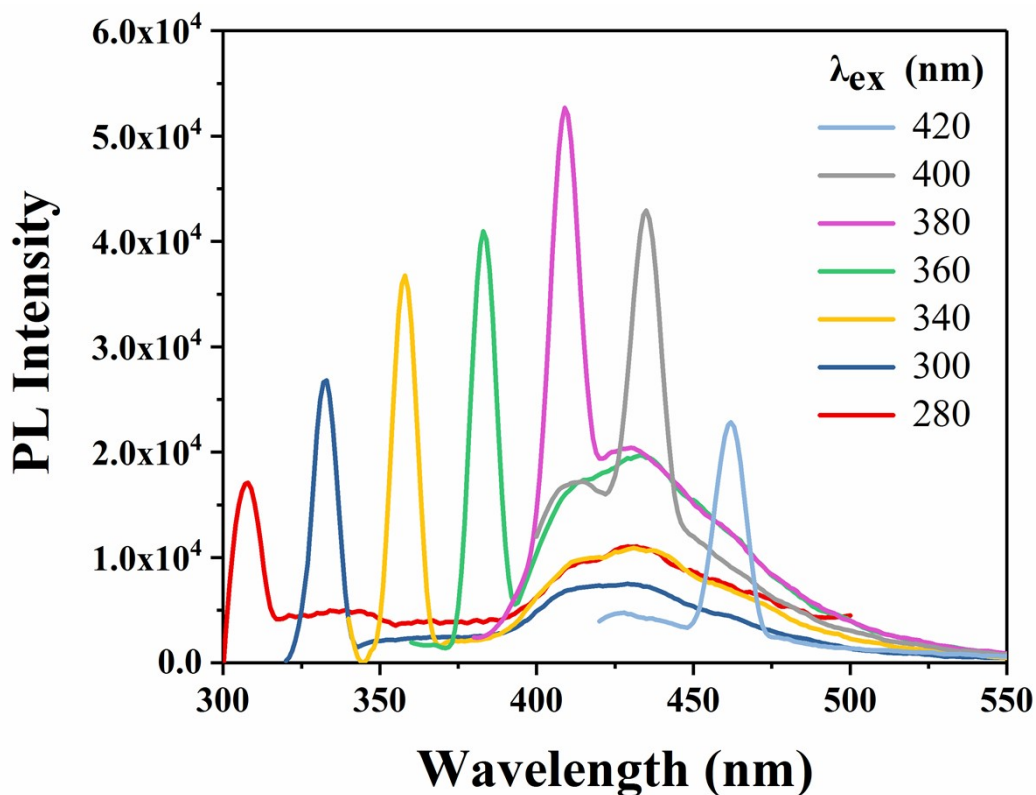

**Figure S7.** PL spectrum of pure solvent (deionized water) under different  $\lambda_{\text{ex}}$

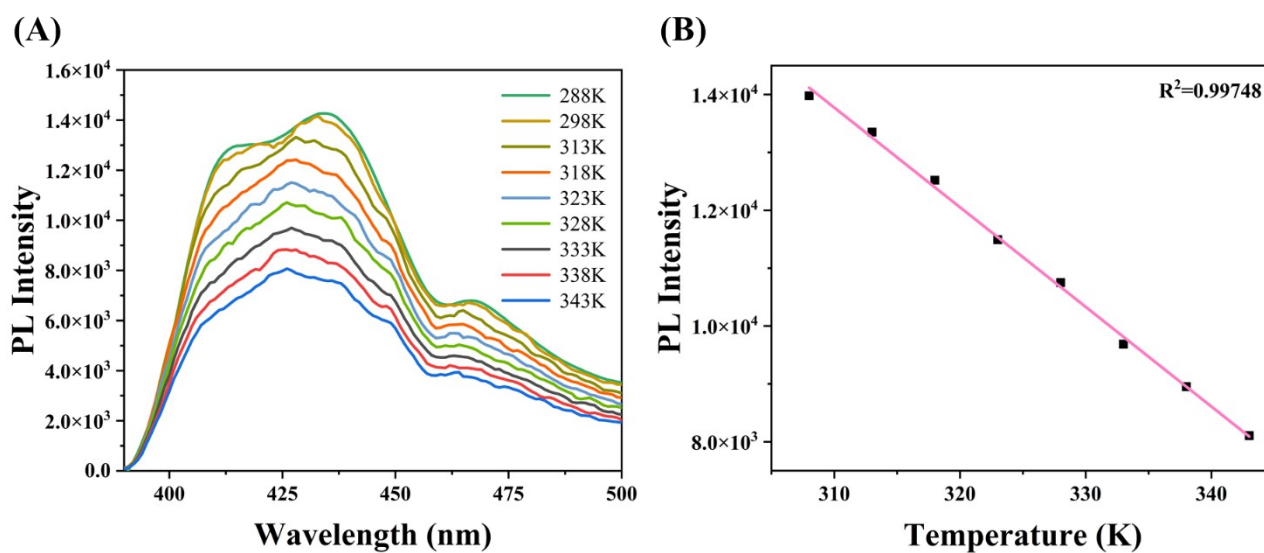

**Figure S8.** (A) Temperature dependence of PVA<sub>105</sub>'s fluorescence spectra under the excitation of 370 nm. (B) Plots of PL intensity of PVA<sub>105</sub> solution (20 mg mL<sup>-1</sup>) in different temperature.

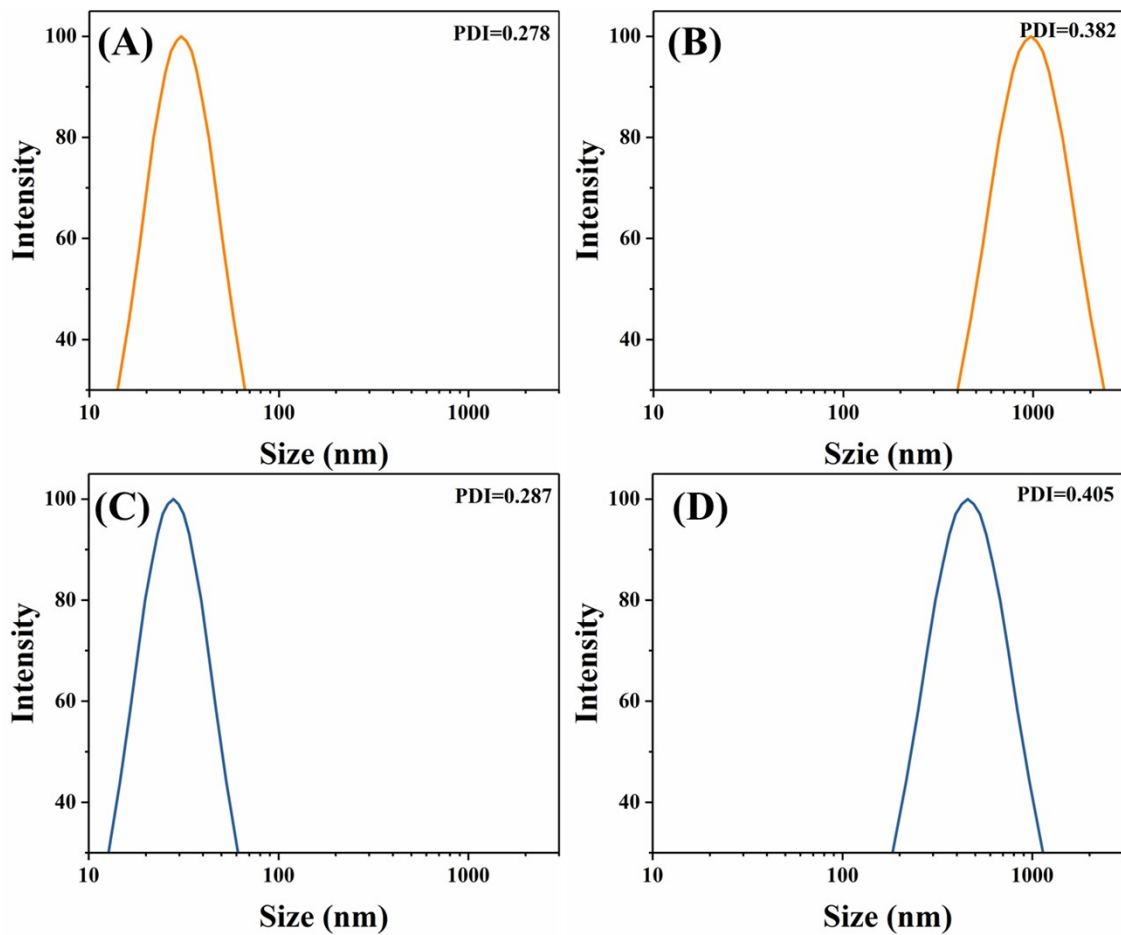

**Figure S9.** DLS results of (A) 10 mg mL<sup>-1</sup> and (B) 20 mg mL<sup>-1</sup> PVA<sub>1788</sub>, (C) 10 mg mL<sup>-1</sup> and (D) 20 mg mL<sup>-1</sup> PVA<sub>1788LV</sub>.

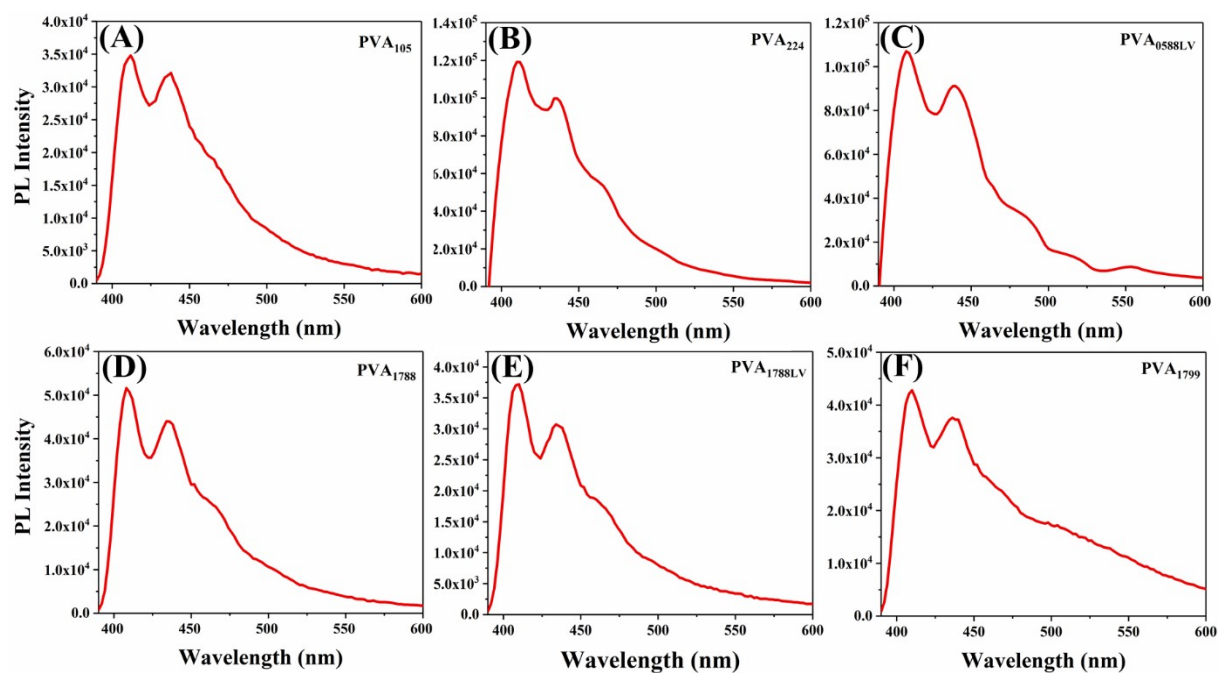

**Figure S10.** PL spectra of A) PVA<sub>105</sub>, B) PVA<sub>224</sub>, C) PVA<sub>0588LV</sub>, D) PVA<sub>1788</sub>, E) PVA<sub>1788LV</sub> and F) PVA<sub>1799</sub> films.

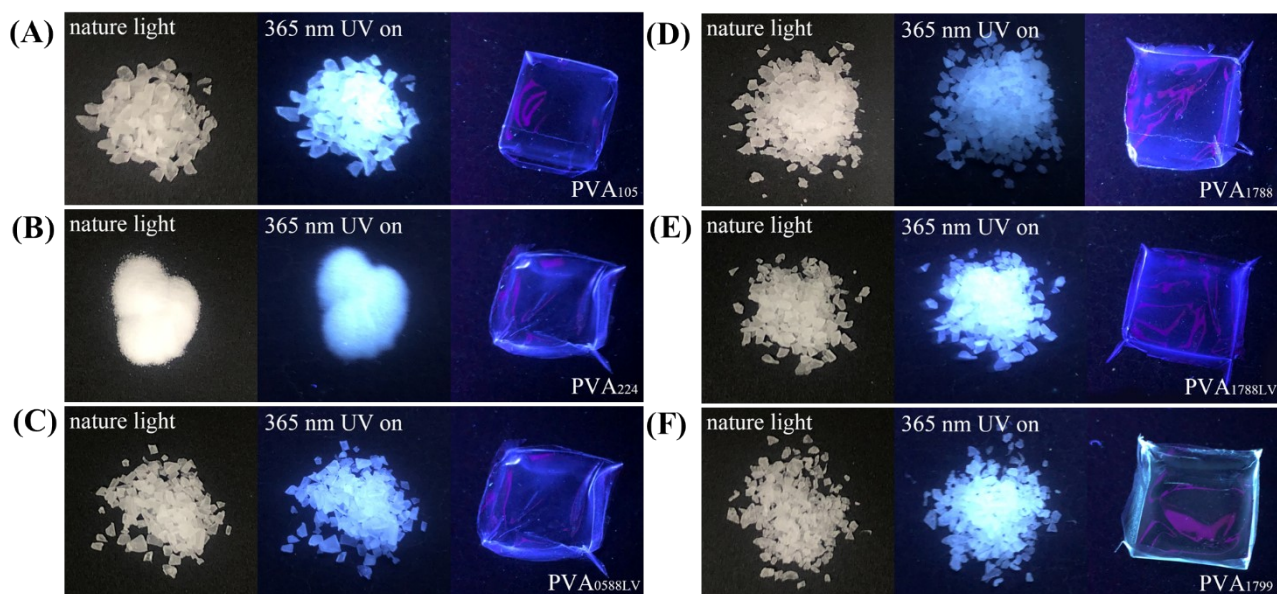

**Figure S11.** Photos taken under nature and 365 nm UV light of A) PVA<sub>105</sub>, B) PVA<sub>224</sub>, C) PVA<sub>0588LV</sub>, D) PVA<sub>1788</sub>, E) PVA<sub>1788LV</sub> and F) PVA<sub>1799</sub> powders and films

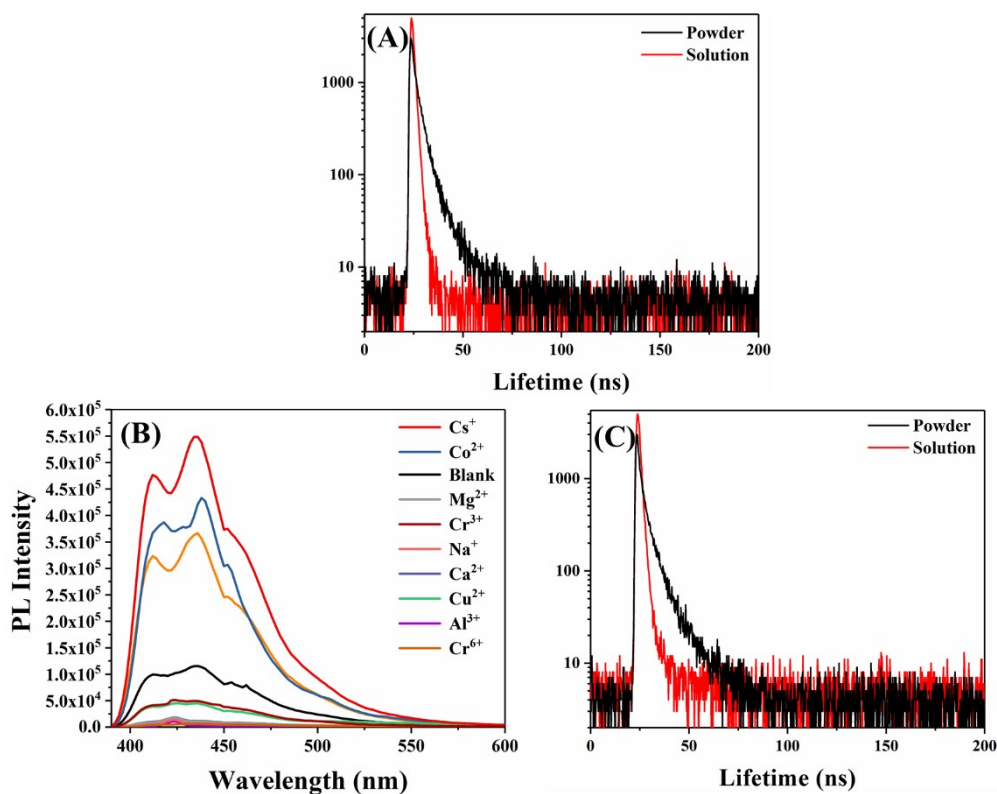

**Figure S12.** A) Fluorescence lifetime of PVA<sub>105</sub> powders and solution. B) PL spectra of PVA<sub>224</sub> aqueous solutions (10 mg mL<sup>-1</sup>) added with different metal ions of same concentration (1 mg mL<sup>-1</sup>). C) Fluorescence lifetime of PVA<sub>224</sub> powders and solution.

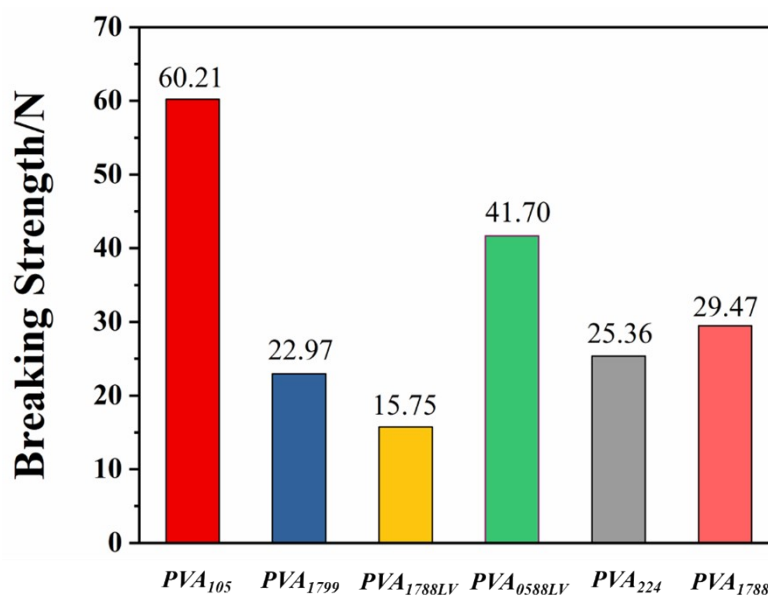

**Figure S13.** Breaking strength of different PVA films.

The breaking strength of PVA film was affected by DP and viscosity. For PVA<sub>105</sub> and PVA<sub>0588LV</sub>, films with low DP and viscosity show high level breaking strength. PVA with high viscosity show good tenacity and difficult to break.



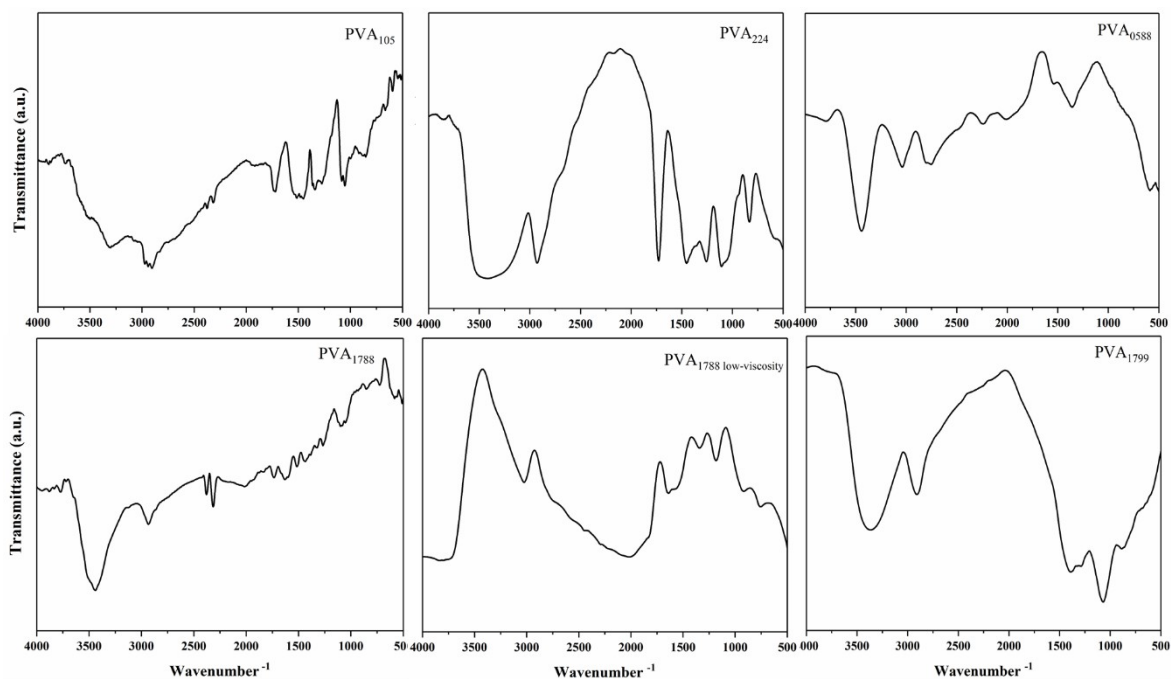

**Figure S14.** FT-IR spectra of different PVA.

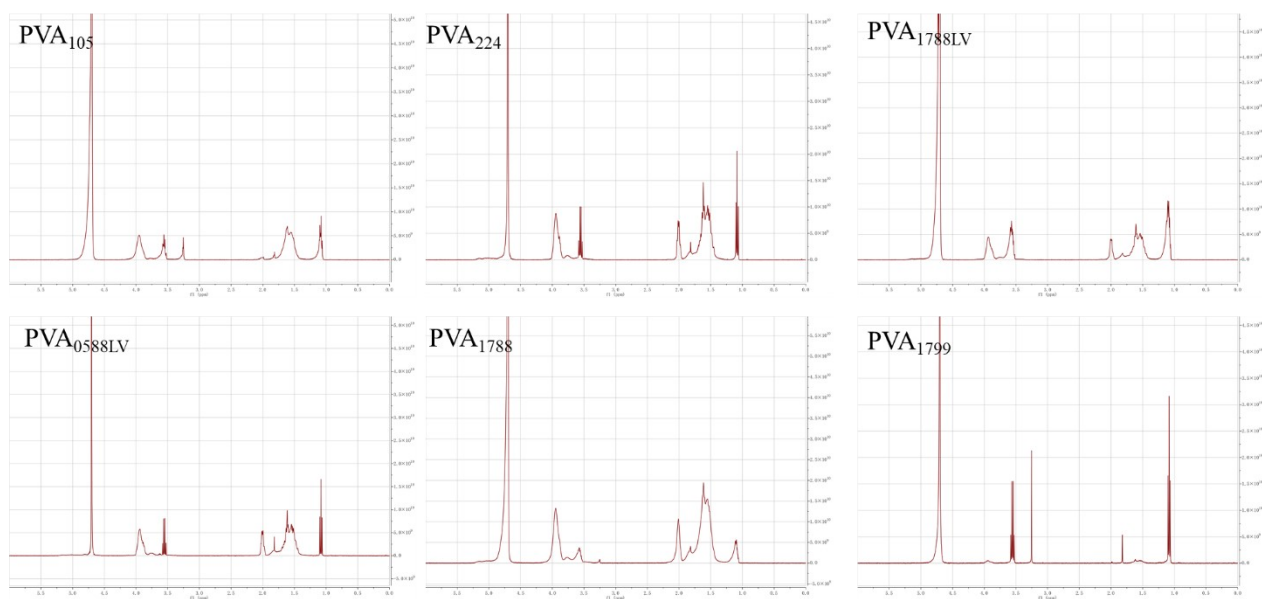

**Figure S15.**  $^1\text{H}$  NMR Spectrum of PVA in  $\text{D}_2\text{O}$  at 400 MHz.

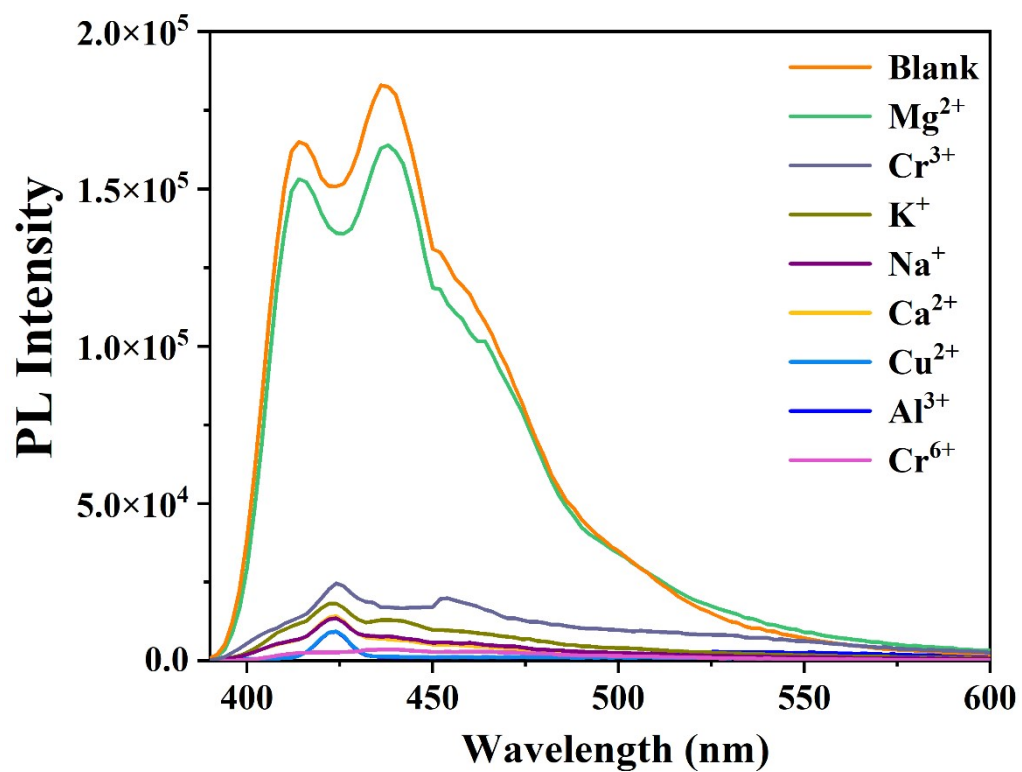

**Figure S16.** PL spectra of PVA<sub>105</sub> aqueous solutions (10 mg mL<sup>-1</sup>) added with different metal ions of same concentration (1 mg mL<sup>-1</sup>).
